# Supplementary material for: Systemic Therapy in Advanced Nodular Melanoma versus Superficial Spreading Melanoma: A Nation-Wide Study of the Dutch Melanoma Treatment Registry
Source: MDPI journal article supplement (doi:10.3390/cancers14225694), 2022-11-19
Supplement: s1 [file s1]

**Table S1.** Multi variable treatment related cox regression distant metastasis free survival analysis.

| Variables         |              | N         | Hazard ratio - 95% CI | P-value         |
|-------------------|--------------|-----------|-----------------------|-----------------|
| Age               |              | 3302      | 0.83 (0.77 – 0.90)    | <b>&lt;0.01</b> |
| Gender            | Male         | 2030 (61) | Reference             |                 |
|                   | Female       | 1302 (39) | 0.83 (0.74 - 1.06)    | 0.19            |
| WHO               | 0 - 1        | 2792 (84) | Reference             |                 |
|                   | 2 - 4        | 59 (11)   | 1.02 (0.99 - 1.06)    | 0.20            |
| Melanoma type     | SSM          | 2246 (67) | Reference             |                 |
|                   | NM           | 1086 (33) | 1.32 (1.20 – 1.45)    | <b>&lt;0.01</b> |
| Ulceration        | Absent       | 1825 (55) | Reference             |                 |
|                   | Present      | 1191 (36) | 1.12 (1.09 – 1.15)    | <b>0.04</b>     |
| Breslow Thickness | 0.1 – 1.0mm  | 457 (14)  | Reference             |                 |
|                   | 1.0 – 2.0 mm | 948 (29)  | 0.91 (0.79 – 1.04)    | 0.18            |
|                   | 2.0 – 4.0mm  | 1064 (32) | 1.01 (0.91 – 1.15)    | 0.07            |
|                   | >4.0mm       | 863 (26)  | 1.25 (1.18 – 34)      | <b>0.01</b>     |
| Satellite lesions | Absent       | 2635 (79) | Reference             |                 |
|                   | Present      | 334 (10)  | 0.98 (0.97 – 1.01)    | 0.18            |
| Dermal mitosis    | Absent       | 307 (9)   | Reference             |                 |
|                   | Present      | 1850 (56) | 0.94 (0.93 – 0.95)    | <b>&lt;0.01</b> |
| BRAF mutation     | Absent       | 1058 (33) | Reference             |                 |
|                   | Present      | 2116 (66) | 0.96 (0.89 – 1.02)    | 0.19            |
| NRAS mutation     | Absent       | 1916 (77) | Reference             |                 |
|                   | Present      | 582 (23)  | 0.98 (0.91 – 1.05)    | 0.55            |

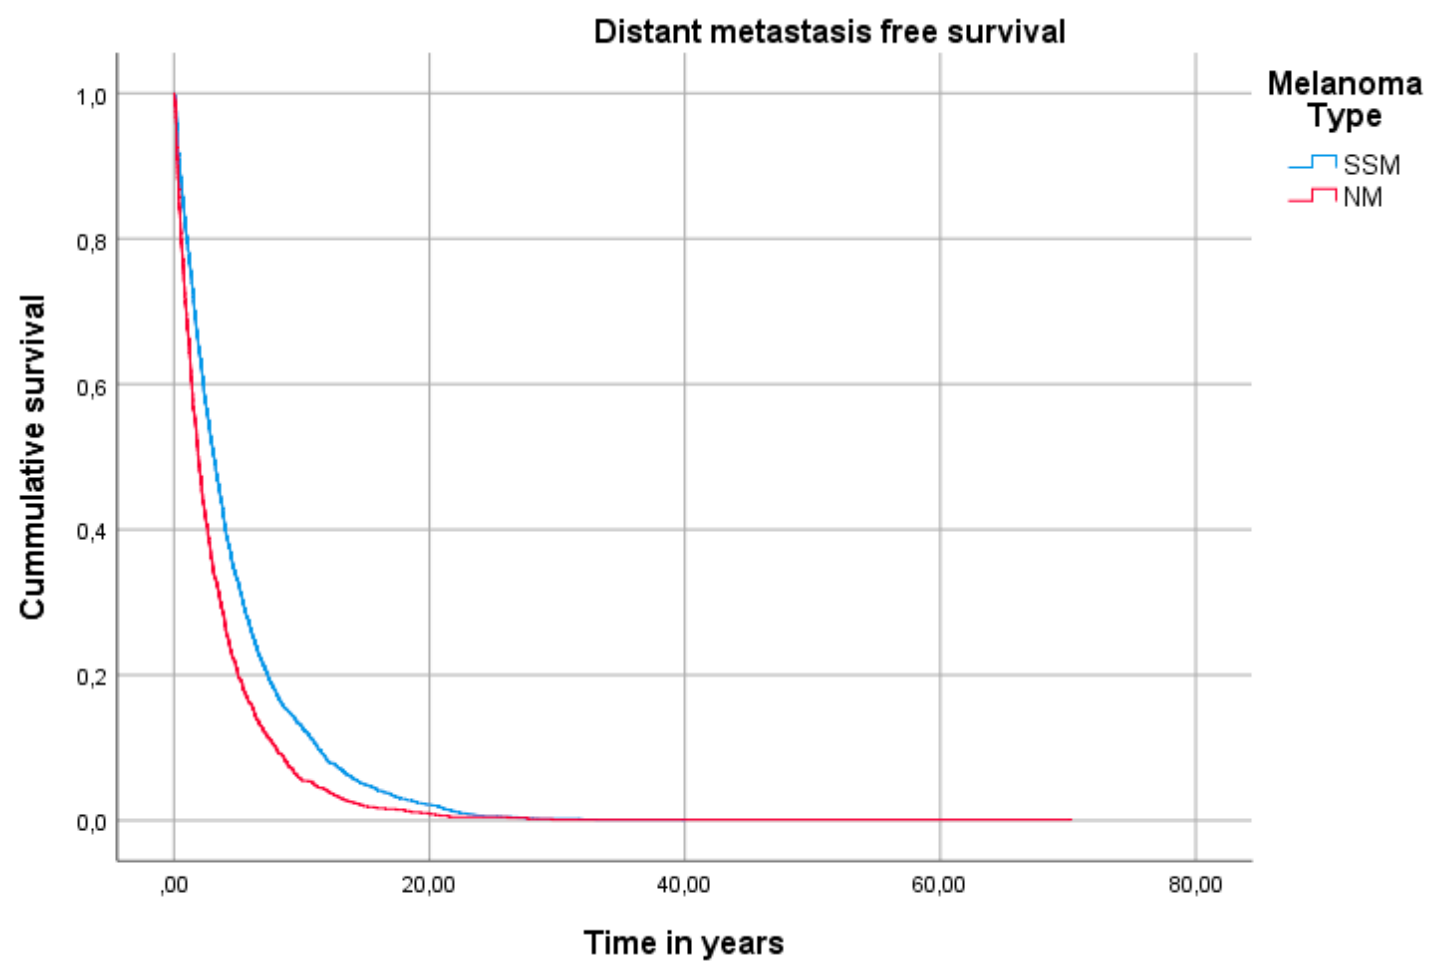

**Figure S1.** Kaplan Meier curve distant metastasis free survival analysis demonstrating the cumulative survival of NM (red) versus SSM (blue).

**Table S2.** Multi variable treatment related cox regression progression free survival analysis in patients treated with immune checkpoint inhibition.

| Variables         |                        | N    | Hazard ratio - 95% CI | P-value         |
|-------------------|------------------------|------|-----------------------|-----------------|
| Age               |                        | 2104 | 1.00 (0.99 – 1.00)    | 0.91            |
| Gender            | Male                   | 1333 | Reference             |                 |
|                   | Female                 | 771  | 0.83 (0.70 – 0.97)    | <b>0.02</b>     |
| WHO               | 0 - 1                  | 1902 | Reference             |                 |
|                   | 2 - 4                  | 79   | 1.02 (0.98 – 1.05)    | 0.32            |
| Treatment type    | Anti-CTLA-4            | 462  | Reference             |                 |
|                   | Ant-PD-1 / Anti-CLTA-4 | 1642 | 0.91 (0.81 – 1.02)    | 0.10            |
| LDH               | Not elevated           | 1609 | Reference             |                 |
|                   | Elevated               | 458  | 1.22 (1.13 – 1.32)    | <b>&lt;0.01</b> |
| Cerebral disease  | Absent                 | 1713 | Reference             |                 |
|                   | Present                | 351  | 1.05 (1.01 - 1.11)    | <b>0.03</b>     |
| Total organ sites | <3                     | 678  | Reference             |                 |
|                   | >2                     | 1137 | 1.01 (0.87 - 1.20)    | 0.82            |
| Melanoma          | SSM                    | 1357 | Reference             |                 |
|                   | NM                     | 747  | 0.87 (0.74 – 1.02)    | 0.09            |
| BRAF mutation     | Absent                 | 1053 | Reference             |                 |
|                   | Present                | 916  | 0.85 (0.74 – 0.97)    | <b>0.02</b>     |
| NRAS mutation     | Absent                 | 1112 | Reference             |                 |
|                   | Present                | 574  | 1.12 (1.01 – 1.24)    | <b>0.03</b>     |

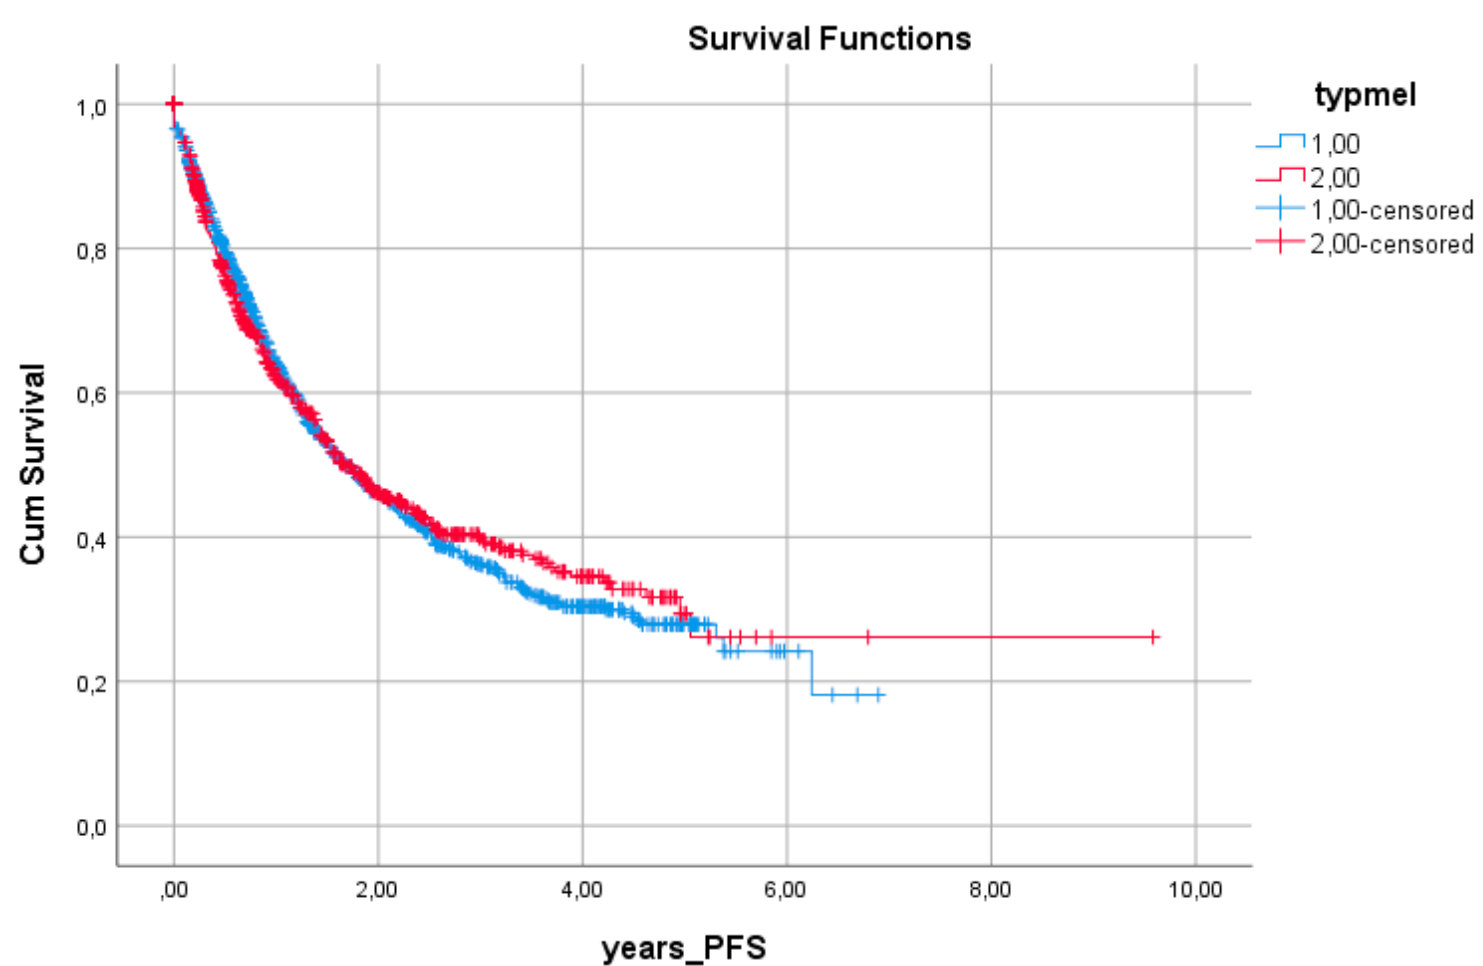

**Figure S2.** Kaplan Meier curve progression free survival analysis demonstrating the cumulative survival of NM (red) versus SSM (blue) patients treated with immune checkpoint inhibition.

**Table S3.** Multi variable treatment related cox regression progression free survival analysis in patients treated with immune checkpoint inhibition.

| Variables         |                        | N    | Hazard ratio - 95% CI | P-value         |
|-------------------|------------------------|------|-----------------------|-----------------|
| Age               |                        | 2104 | 1.00 (0.99 – 1.00)    | 0.91            |
| Gender            | Male                   | 1333 | Reference             |                 |
|                   | Female                 | 771  | 0.83 (0.70 – 0.97)    | <b>0.02</b>     |
| WHO               | 0 - 1                  | 1902 | Reference             |                 |
|                   | 2 - 4                  | 79   | 1.02 (0.98 – 1.05)    | 0.32            |
| Treatment type    | Anti-CTLA-4            | 462  | Reference             |                 |
|                   | Ant-PD-1 / Anti-CLTA-4 | 1642 | 0.91 (0.81 – 1.02)    | 0.10            |
| LDH               | Not elevated           | 1609 | Reference             |                 |
|                   | Elevated               | 458  | 1.22 (1.13 – 1.32)    | <b>&lt;0.01</b> |
| Cerebral disease  | Absent                 | 1713 | Reference             |                 |
|                   | Present                | 351  | 1.05 (1.01 - 1.11)    | <b>0.03</b>     |
| Total organ sites | <3                     | 678  | Reference             |                 |
|                   | >2                     | 1137 | 1.01 (0.87 - 1.20)    | 0.82            |
| Melanoma          | SSM                    | 1357 | Reference             |                 |
|                   | NM                     | 747  | 0.87 (0.74 – 1.02)    | 0.09            |
| BRAF mutation     | Absent                 | 1053 | Reference             |                 |
|                   | Present                | 916  | 0.85 (0.74 – 0.97)    | <b>0.02</b>     |
| NRAS mutation     | Absent                 | 1112 | Reference             |                 |
|                   | Present                | 574  | 1.12 (1.01 – 1.24)    | <b>0.03</b>     |

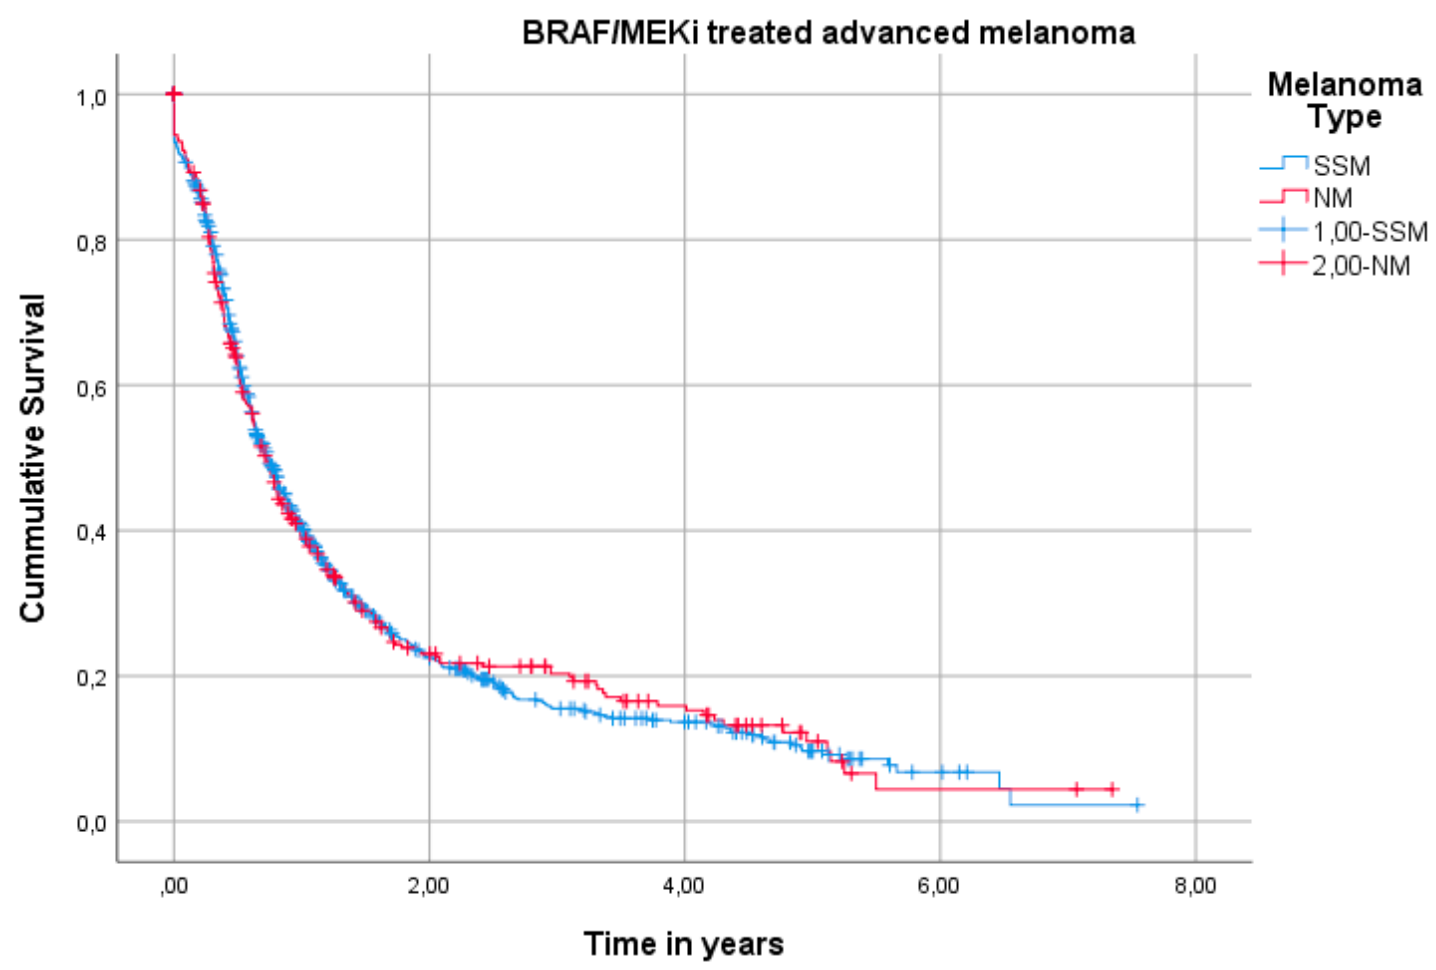

**Figure S3.** Kaplan Meier curve survival analysis demonstrating the cumulative survival of NM (red) versus SSM (blue) patients treated with immune checkpoint inhibition.
